# Supplementary material for: A general conversion of polyacrylate–metal complexes into porous carbons especially evinced in the case of magnesium polyacrylate
Source: Royal Society of Chemistry journal article supplement (doi:10.1039/c3ta01330h), 2013-01-01
Supplement: c3ta01330h.pdf [file c3ta01330h.pdf]

### Supporting Information:

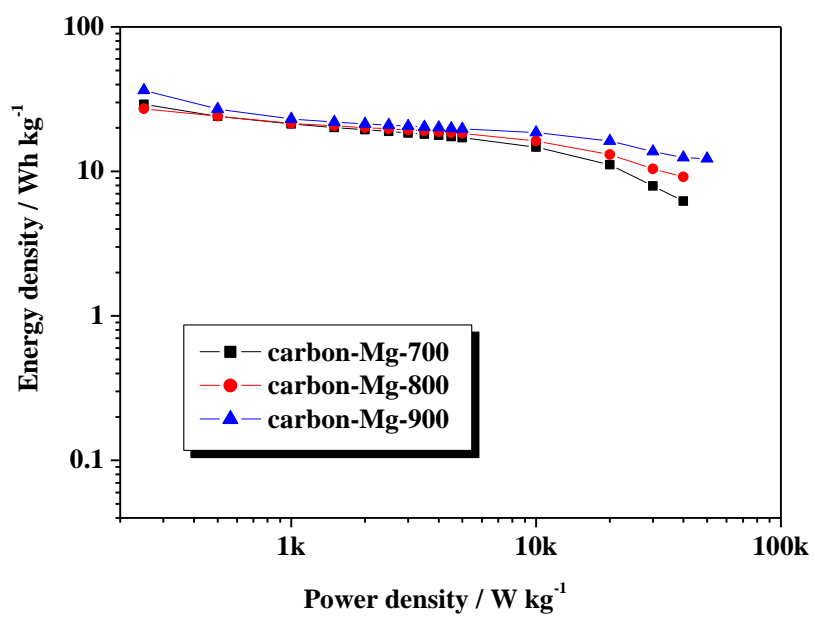

**Figure S1.** Ragone plots showing energy density vs. power density of the **carbon-Mg-700/800/900** samples.

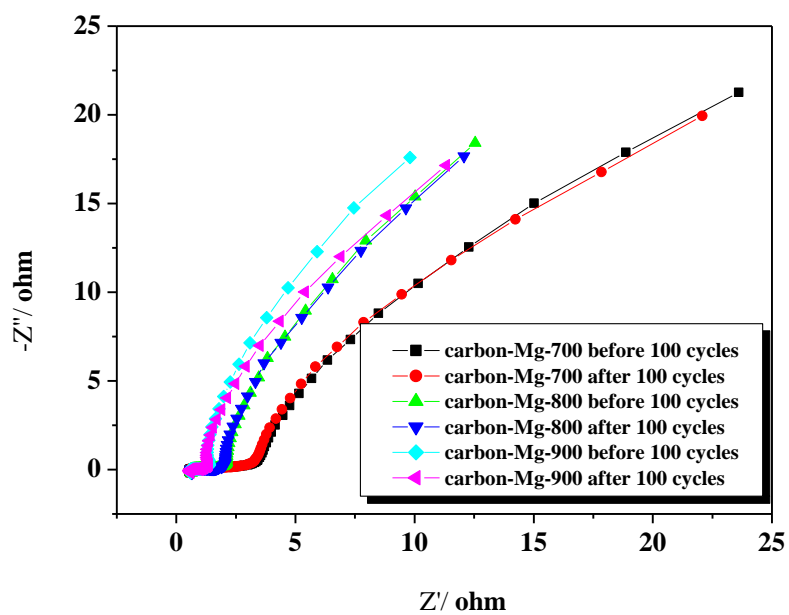

**Figure S2.** Nyquist plots before/after 100 cycles of the **carbon-Mg-700/800/900** samples.

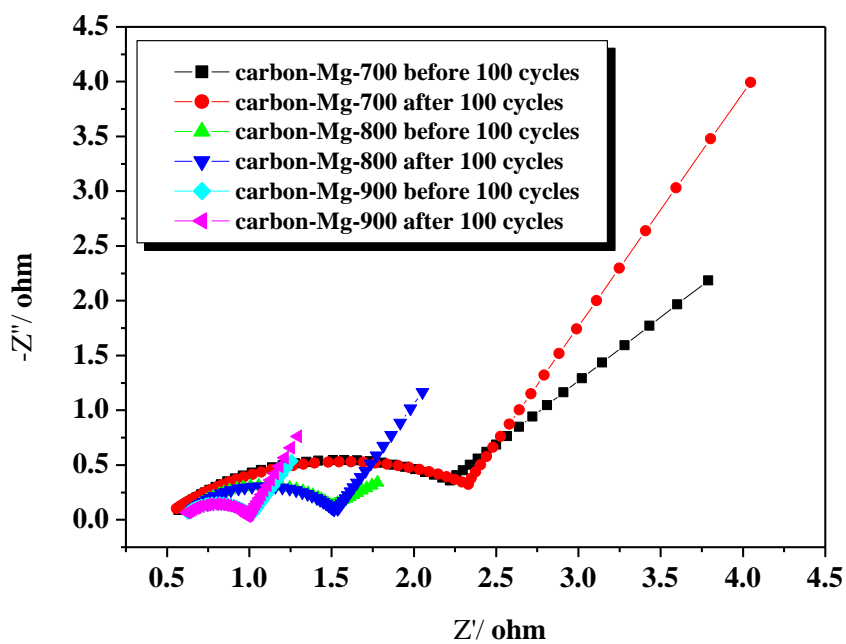

**Figure S3.** Nyquist plots before/after 100 cycles of the **carbon-Mg-700/800/900** samples fitted by Zview software.

**Table S1. The overall resistance ( $R_t$ ), electrical connection resistance ( $R_e$ ), electrolyte resistance ( $R_s$ ), and resistance of ion migration in carbon micropores ( $R_p$ ) of the carbon samples.**

| Samples                                 | $R_t$  | $R_s$  | Resistance (Ohm) |        |  |
|-----------------------------------------|--------|--------|------------------|--------|--|
|                                         |        |        | $R_e$            | $R_p$  |  |
| <b>carbon-Mg-700</b> -before 100 cycles | 3.7888 | 0.5697 | 1.6491           | 1.5700 |  |
| <b>carbon-Mg-700</b> -after 100 cycles  | 4.0459 | 0.5571 | 1.7750           | 1.7138 |  |
| <b>carbon-Mg-800</b> -before 100 cycles | 1.7785 | 0.6580 | 0.8451           | 0.2754 |  |
| <b>carbon-Mg-800</b> -after 100 cycles  | 2.0519 | 0.6577 | 0.8573           | 0.5369 |  |
| <b>carbon-Mg-900</b> -before 100 cycles | 1.2569 | 0.6261 | 0.3758           | 0.2550 |  |
| <b>carbon-Mg-900</b> -after 100 cycle   | 1.2958 | 0.6221 | 0.3661           | 0.3077 |  |
